# Supplementary material for: Maternal obesity alters C19MC microRNAs expression profile in fetal umbilical cord blood
Source: Nutr Metab (Lond). 2020 Jul 6;17:52. doi: 10.1186/s12986-020-00475-7 (PMC7339545; doi:10.1186/s12986-020-00475-7)
Supplement: Supplementary file 1 — Additional file 1: Table S1. Differentially expressed known miRNAs in overweight/obese and control groups. [file 12986_2020_475_MOESM1_ESM.xlsx]

## Sheet: Sheet1
Supplementary table 1. Differentially expressed known miRNAs in overweight/obese and control groups.
miRNA id	Read count (Control)	Read count (Obesity)	Expression (Control)	Expression (Obesity)	log2Ratio (Obesity/Control)	Up down regulation	P value	Q value
hsa-miR-550a-3p	1	28	0.009429	0.165889	4.49396	UP	0	1e-06
hsa-miR-519d-3p	3	45	0.025	0.262556	3.59349	UP	0	0
hsa-miR-6793-5p	1	15	0.009429	0.083667	3.59349	UP	0.000508	0.000959
hsa-miR-519a-5p	2	28	0.017857	0.168222	3.49396	UP	3e-06	7e-06
hsa-miR-517b-3p	4	55	0.032143	0.333556	3.46796	UP	0	0
hsa-miR-523-5p	3	31	0.028	0.201444	3.05584	UP	3e-06	8e-06
hsa-miR-516a-5p	26	246	0.196	1.45222	2.92868	UP	0	0
hsa-miR-483-3p	64	539	0.555714	3.32889	2.76074	UP	0	0
hsa-miR-516b-5p	196	1149	1.54429	6.97	2.23806	UP	0	0
hsa-miR-483-5p	519	3030	4.38857	18.8322	2.23211	UP	0	0
hsa-miR-378g	1296	7515	10.0014	47.32	2.22231	UP	0	0
hsa-miR-369-3p	106	599	0.854286	3.50111	2.18509	UP	0	0
hsa-miR-548ar-3p	68	383	0.57	2.68222	2.18034	UP	0	0
hsa-miR-522-3p	12	64	0.094571	0.398111	2.10164	UP	0	0
hsa-miR-1248	11	56	0.093286	0.305778	2.03453	UP	1e-06	2e-06
hsa-miR-1228-5p	19	90	0.157429	0.489111	1.93053	UP	0	0
hsa-miR-520a-3p	35	158	0.268714	0.95	1.8611	UP	0	0
hsa-miR-518e-5p	9	39	0.064857	0.242444	1.80208	UP	0.000126	0.000268
hsa-miR-1323	166	688	1.26871	4.18889	1.73783	UP	0	0
hsa-miR-4433b-3p	97	392	0.782857	2.14111	1.7014	UP	0	0
hsa-miR-3910	24	95	0.193	0.655556	1.67149	UP	0	0
hsa-miR-378e	2937	11505	24.01	73.3067	1.65645	UP	0	0
hsa-miR-517a-3p	18	69	0.133	0.403667	1.6252	UP	2e-06	5e-06
hsa-miR-32-5p	201	766	1.64	4.78	1.61675	UP	0	0
hsa-miR-1246	1938	6951	16.2086	42.9589	1.52925	UP	0	0
hsa-miR-378f	3039	10835	26.9129	57.0567	1.52063	UP	0	0
hsa-miR-539-3p	55	193	0.433	1.24222	1.4977	UP	0	0
hsa-miR-3613-3p	32	97	0.26	0.560111	1.28652	UP	2e-06	6e-06
hsa-miR-224-5p	838	2515	7.02	15.0922	1.27214	UP	0	0
hsa-miR-1268a	46	133	0.364286	0.758889	1.21832	UP	0	0
hsa-miR-548ar-5p	24	69	0.194286	0.457778	1.21016	UP	0.000148	0.00031
hsa-miR-199b-3p	175	502	1.41	3.12344	1.20694	UP	0	0
hsa-miR-1278	21	60	0.161571	0.423556	1.20118	UP	0.000435	0.000834
hsa-miR-376c-3p	183	502	1.49571	3.07444	1.14245	UP	0	0
hsa-miR-452-5p	270	721	2.26714	4.29333	1.10364	UP	0	0
hsa-miR-561-5p	83	215	0.644286	1.39333	1.05976	UP	0	0
hsa-miR-4433a-5p	49	126	0.39	0.708889	1.04917	UP	5e-06	1.2e-05
hsa-miR-624-5p	69	176	0.551429	1.20333	1.03751	UP	0	0
hsa-miR-4443	356	221	2.85	1.41333	-1.00123	DOWN	0	0
hsa-miR-143-5p	206	122	1.63857	0.753444	-1.06916	DOWN	0	0
hsa-miR-378i	15167	8839	124.089	59.2244	-1.09238	DOWN	0	0
hsa-miR-378b	8940	5141	69.8243	30.7256	-1.11162	DOWN	0	0
hsa-miR-1260a	1427	727	11.9629	5.20444	-1.28636	DOWN	0	0
hsa-miR-122-5p	9195	4483	75.5343	29.2833	-1.34978	DOWN	0	0
hsa-miR-3913-5p	287	129	2.33286	0.833333	-1.46708	DOWN	0	0
hsa-miR-3130-5p	77	34	0.645857	0.204889	-1.49272	DOWN	0	0
hsa-miR-4669	223	80	1.91857	0.575667	-1.79237	DOWN	0	0
hsa-miR-7977	68	24	0.573143	0.166778	-1.8159	DOWN	0	0
hsa-miR-4482-5p	44	14	0.347571	0.085111	-1.96547	DOWN	1e-06	4e-06
hsa-miR-196a-5p	94	21	0.781857	0.145889	-2.47567	DOWN	0	0
hsa-miR-4482-3p	166	28	1.303	0.175889	-2.88108	DOWN	0	0
hsa-miR-615-3p	69	8	0.544714	0.052667	-3.42192	DOWN	0	0
