# Supplementary material for: Maternal obesity alters C19MC microRNAs expression profile in fetal umbilical cord blood
Source: Nutr Metab (Lond). 2020 Jul 6;17:52. doi: 10.1186/s12986-020-00475-7 (PMC7339545; doi:10.1186/s12986-020-00475-7)
Supplement: Supplementary file 2 — Additional file 2: Table S2. Characteristics of eight differentially expressed C19MC microRNAs. List of microRNAs’ ID, NCBI location in chromosome and their nucleotide sequence. [file 12986_2020_475_MOESM2_ESM.xlsx]

## Sheet: Sheet1
Supplementary table 2. Characteristics of eight differentially expressed C19MC microRNAs.
miRNA ID	NCBI Location chromosome	microRNA sequence
hsa-miR-519d-3p	chr19: 53713347-53713434 [+]	5’-CAAAGUGCCUCCCUUUAGAGUG-3’
hsa-miR-517b-3p	chr19: 53721076-53721142 [+]	5’-AUCGUGCAUCCCUUUAGAGUGU-3’
hsa-miR-523-5p	chr19: 53698385-53698471 [+]	5’-CUCUAGAGGGAAGCGCUUUCUG-3’
hsa-miR-516a-5p	chr19: 53756741-53756830 [+]	5’-UUCUCGAGGAAAGAAGCACUUUC-3’
hsa-miR-516b-5p	chr19: 53725442-53725526 [+]	5’-AUCUGGAGGUAAGAAGCACUUU-3’
hsa-miR-522-3p	chr19: 53751211-53751297 [+]	5’-AAAAUGGUUCCCUUUAGAGUGU-3’
hsa-miR-520a-3p	chr19: 53690881-53690965 [+]	5’-AAAGUGCUUCCCUUUGGACUGU-3’
hsa-miR-1323	chr19: 53671968-53672040 [+]	5’-UCAAAACUGAGGGGCAUUUUCU-3’
List of microRNAs’ ID, NCBI location in chromosome and their nucleotide sequence.
